# Supplementary material for: Development of a Biosensor to Detect Venom of Malayan Krait (Bungarus candidus)
Source: MDPI journal article supplement (doi:10.3390/toxins16010056), 2024-01-19
Supplement: s1 [file s1]

# Supplementary Materials: Development of a Biosensor to Detect Venom of Malayan Krait (*Bungarus candidus*)

Kiattawee Choowongkomon, Janeyuth Chaisakul, Supaphorn Seetaha, Taksa Vasaruchapong, Wayne C. Hodgson, Natchaya Rasri, Katechawin Chaeksin, Sattawat Boonchaleaw and Nattapon Sookprasert

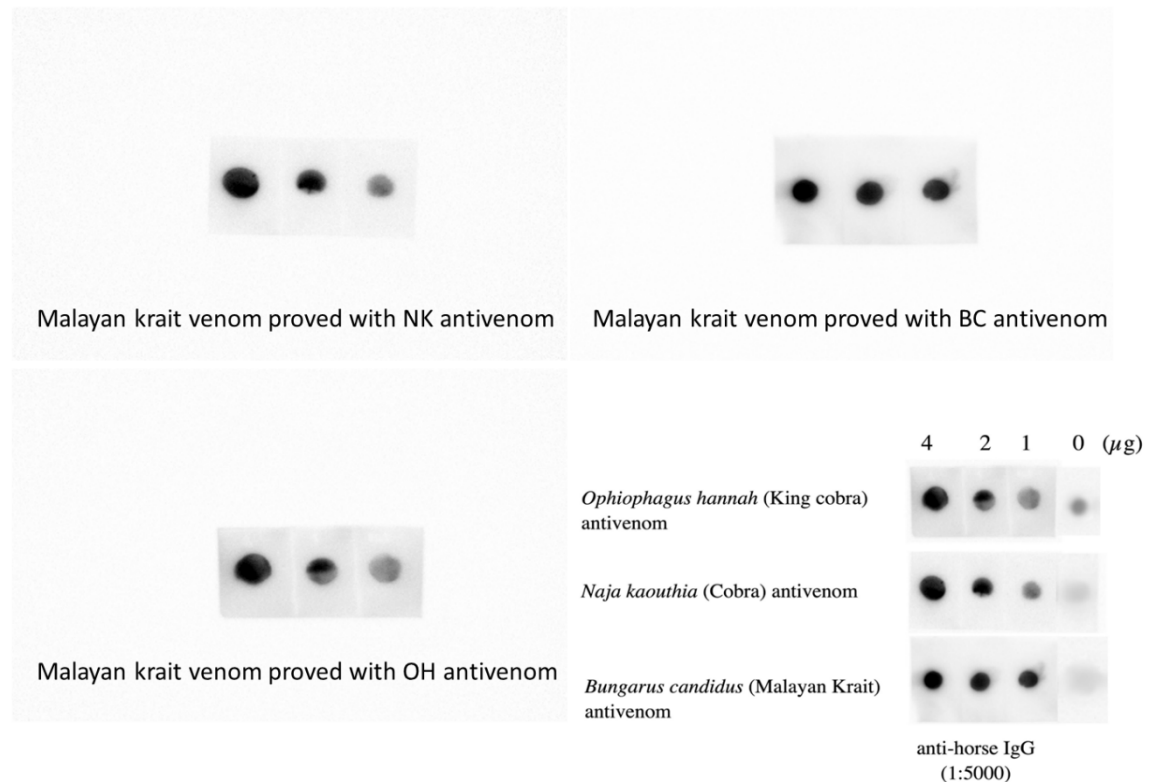

Figure S1: Original dot blot.

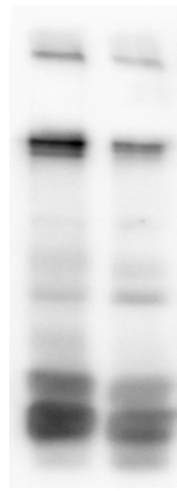

Western blot

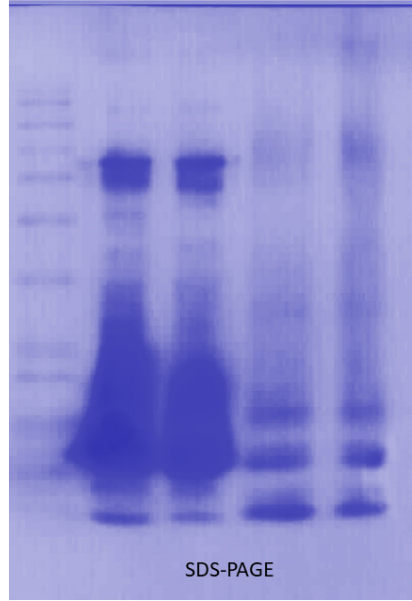

SDS-PAGE

**Figure S2:** Original SDS=PAGE and Western immune blotting.

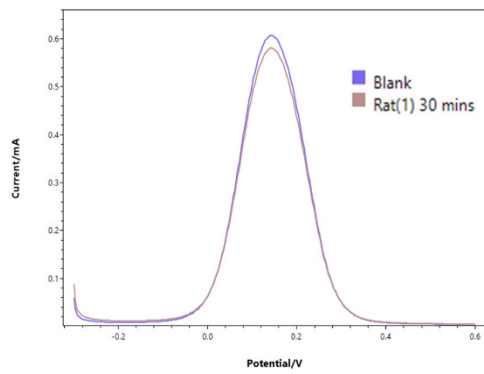

(a)

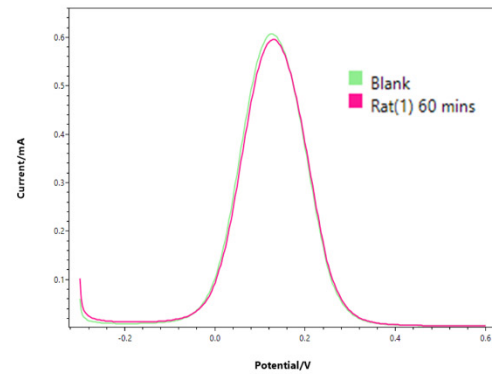

(b)

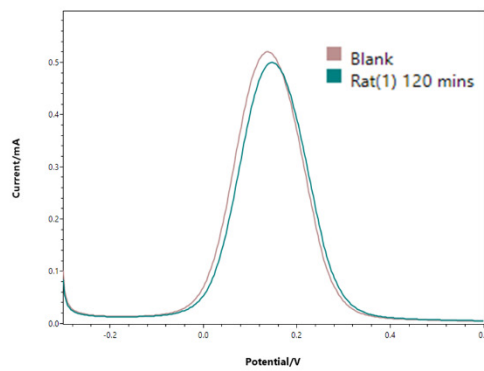

(c)

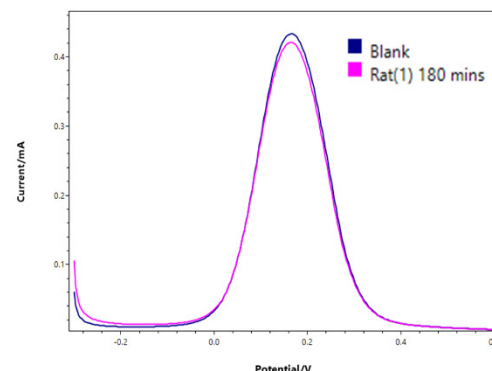

(d)

**Figure S3:** The SWV measurements curve of *B. candidus* venom measured after injected into rat at 30 (a), 60 (b), 120 (c) and 180 (d) min on individual biosensor.

## Warburg diffusion element

Circuit Fitting : -Z Imaginary / Z Real

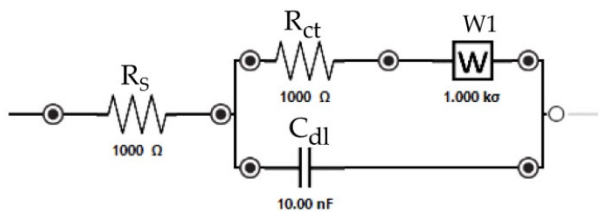

$$Z_W = \frac{A_W}{\sqrt{\omega}} + \frac{A_W}{j\sqrt{\omega}}$$

Equivalent circuit : R([RW]C)

R = Resistor

W = Warburg element

C = Capacitor

- $A_W$  is the Warburg coefficient (or Warburg constant)
- $j$  is the imaginary unit
- $\omega$  is the angular frequency

**Figure S4:** Warburg diffusion element.
